# Supplementary material for: MET Amplification and Exon 14 Splice Site Mutation Define Unique Molecular Subgroups of Non–Small Cell Lung Carcinoma with Poor Prognosis
Source: Oxford University Press journal article supplement (doi:10.1158/1078-0432.ccr-15-2061), 2016-02-04
Supplement: 10780432ccr152061-sup-154620_1_supp_3292076_t09sps.docx [file 10780432ccr152061-sup-154620_1_supp_3292076_t09sps.docx]

Supplementary Table 1 Clinicopathologic characteristics of the study cohort

|  |  | NSCLC | AD | SCC | LCC | ADSQ | LELC | PSC |
| --- | --- | --- | --- | --- | --- | --- | --- | --- |
|  |  | (n=687) | (n=392) | (n=180) | (n=45) | (n=21) | (n=27) | (n=22) |
| Age | Mean±S.D | 64.4±11.1 | 64.2±11.6 | 66.2±9.3 | 64.5±11.6 | 66.8±7.7 | 55.4±10.6 | 64.6±12.8 |
|  | Median (range) | 66 (27-94) | 66 (27-94) | 68 (34-84) | 66 (37-81) | 68 (51-80) | 51 (37-79) | 67 (40-83) |
| Gender | Male | 464 | 218 | 167 | 35 | 15 | 13 | 16 |
|  | Female | 223 | 174 | 13 | 10 | 6 | 14 | 6 |
| Smoking History | Never-Smoker | 223 | 178 | 10 | 7 | 7 | 15 | 6 |
|  | Ever-Smoker | 395 | 172 | 155 | 35 | 12 | 7 | 14 |
| Pathologic stage | I | 266 | 168 | 59 | 13 | 8 | 11 | 7 |
|  | II | 164 | 75 | 60 | 13 | 4 | 6 | 6 |
|  | III | 175 | 96 | 49 | 12 | 5 | 8 | 5 |
|  | IV | 69 | 47 | 7 | 6 | 4 | 1 | 4 |
| Pathologic stage | I-IIIA | 583 | 324 | 165 | 35 | 17 | 25 | 17 |
|  | IIIB-IV | 91 | 62 | 10 | 9 | 4 | 1 | 5 |
