# Supplementary material for: MET Amplification and Exon 14 Splice Site Mutation Define Unique Molecular Subgroups of Non–Small Cell Lung Carcinoma with Poor Prognosis
Source: Oxford University Press journal article supplement (doi:10.1158/1078-0432.ccr-15-2061), 2016-02-04
Supplement: 10780432ccr152061-sup-154620_1_supp_3292079_w09sps.docx [file 10780432ccr152061-sup-154620_1_supp_3292079_w09sps.docx]

Supplementary Table 4 Summary of 29 MET FISH positive NSCLC and their co-mutation status

|  |  |  | MET status | | | | |  |  |  |
| --- | --- | --- | --- | --- | --- | --- | --- | --- | --- | --- |
| Serial No. | Case No. | Histology | IHC | PathVysion | Cappuzzo | High-Amp | L-Amp/H-GCN | L-Amp/L-GCN | Polysomy | Co-existing Driver mutation |
| 1 | 23 | SACA | Pos | Pos | Pos | Pos |  |  |  | MET |
| 2 | 110 | AD | Pos | Pos | Pos | Pos |  |  |  |  |
| 3 | 172 | AD | Pos | Pos | Pos | Pos |  |  |  |  |
| 4 | 186 | LCC | Pos | Pos | Pos | Pos |  |  |  |  |
| 5 | 432 | AD | Pos | Pos | Pos | Pos |  |  |  |  |
| 6 | 565 | AD | Pos | Pos | Pos | Pos |  |  |  |  |
| 7 | 576 | AD | Pos | Pos | Pos | Pos |  |  |  | MET |
| 8 | 612 | AD | Pos | Pos | Pos | Pos |  |  |  | MET |
| 9 | 136 | AD | Pos | Pos | Pos |  | Pos |  |  |  |
| 10 | 250 | AD | Pos | Pos | Pos |  | Pos |  |  | EGFR |
| 11 | 461 | AD | Pos | Pos | Pos |  | Pos |  |  | MET |
| 12 | 553 | AD | Pos | Pos | Pos |  | Pos |  |  |  |
| 13 | 689 | AD |  | Pos | Pos |  | Pos |  |  |  |
| 14 | 694 | AD | Pos | Pos | Pos |  | Pos |  |  |  |
| 15 | 875 | SACA | Pos | Pos | Pos |  | Pos |  |  |  |
| 16 | 558 | AD |  | Pos |  |  |  | Pos |  |  |
| 17 | 700 | LCC | Pos | Pos |  |  |  | Pos |  |  |
| 18 | 765 | LELC |  | Pos |  |  |  | Pos |  |  |
| 19 | 769 | LCC |  | Pos |  |  |  | Pos |  |  |
| 20 | 804 | SACA | Pos | Pos |  |  |  | Pos |  | KRAS |
| 21 | 75 | SCC | Pos |  | Pos |  |  |  | Pos | MET |
| 22 | 191 | SCC | Pos |  | Pos |  |  |  | Pos | KRAS |
| 23 | 265 | SCC | Pos |  | Pos |  |  |  | Pos | EGFR |
| 24 | 282 | SCC | Pos |  | Pos |  |  |  | Pos | EGFR |
| 25 | 303 | SCC | Pos |  | Pos |  |  |  | Pos | EGFR |
| 26 | 521 | SCC | Pos |  | Pos |  |  |  | Pos | EGFR |
| 27 | 541 | AD | Pos |  | Pos |  |  |  | Pos | EGFR |
| 28 | 807 | AD | Pos |  | Pos |  |  |  | Pos |  |
| 29 | 894 | AD | Pos |  | Pos |  |  |  | Pos | MET |
