# Supplementary material for: MET Amplification and Exon 14 Splice Site Mutation Define Unique Molecular Subgroups of Non–Small Cell Lung Carcinoma with Poor Prognosis
Source: Oxford University Press journal article supplement (doi:10.1158/1078-0432.ccr-15-2061), 2016-02-04
Supplement: 10780432ccr152061-sup-154620_1_supp_3292080_309sps.docx [file 10780432ccr152061-sup-154620_1_supp_3292080_309sps.docx]

Supplementary Table 5 Correlation between MET IHC and DNA alterations in NSCLC samples

|  | MET∆14 | | MET FISH | | FISH by Cappuzzo | | FISH by Pathvysion | | FISH by H-Amp | |
| --- | --- | --- | --- | --- | --- | --- | --- | --- | --- | --- |
|  | Pos | Neg | Pos | Neg | Pos | Neg | Pos | Neg | Pos | Neg |
| IHC+ | 18 | 212 | 25 | 205 | 23 | 207 | 16 | 214 | 8 | 222 |
| IHC- | 0 | 457 | 4 | 453 | 1 | 456 | 4 | 453 | 0 | 457 |
|  |  |  |  |  |  |  |  |  |  |  |
|  | % | 95%CI | % | 95%CI | % | 95%CI | % | 95%CI | % | 95%CI |
| Sensitivity | 100.0 | 81.5 to 100.0 | 86.2 | 68.3 to 96.1 | 95.8 | 78.9 to 99.9 | 80.0 | 56.3 to 94.3 | 100.0 | 63.2 to 100.0 |
| Specificity | 68.3 | 64.6 to 71.8 | 68.8 | 65.2 to 72.4 | 68.8 | 65.1 to 72.3 | 67.9 | 64.2 to 71.5 | 67.3 | 63.6 to 70.8 |
| PPV | 7.8 | 4.7 to 12.1 | 10.9 | 7.2 to 15.6 | 10.0 | 6.5 to 14.6 | 6.96 | 4.0 to 11.1 | 3.5 | 1.5 to 6.7 |
| NPV | 100.0 | 99.2 to 100.0 | 99.1 | 97.8 to 99.8 | 99.8 | 98.8 to 100.0 | 99.1 | 97.8 to 99.8 | 100.0 | 99.2 to 100.0 |
